# Supplementary material
Source: publisher figshare collection journal article supplement (https://brill.figshare.com/ndownloader/files/24443036)
Supplement: Supplementary file 1 [file 24443036]

## Sheet: Sheet1
Appendix A. Full results of the three linear model series: effects of Tylodelphys only, effects of all parasites from Lake Hayes, and differences between the Hayes and Waihola populations. *Significant interactions P < 0.05.
	Tylodelphys Only Models						All Hayes Parasites						Hayes vs Waihola
	Predictors	Estimate	Standard Error	t-value	P-value		Predictors	Estimate	Standard Error	t-value	P-value		Predictors	Estimate	Standard Error	t-value	P-value
Boldness
	Intercept	6.74922	0.700697	9.63215	< 0.001*		Intercept	6.66079	0.692297	9.62129	< 0.001*		Intercept	6.65739	0.840795	7.91798	< 0.001*
	Tylodelphys	-0.0448919	0.0177505	-2.52905	0.017*		Tylodelphys	-0.0706524	0.0281914	-2.50617	0.019*		Waihola	0.507229	3.7711	0.134504	0.893774
	Sex - Male	0.82645	0.922559	0.895824	0.377984		Apatemon	0.000592414	0.0038977	0.151991	0.880465		Apatemon:Hayes	-0.00428845	0.00395324	-1.08479	0.285429
							Telogaster	-0.257305	0.188359	-1.36603	0.184593		Apatemon:Waihola	0.0366116	0.0291251	1.25704	0.217062
							Stegodexamene	-0.105381	0.144617	-0.728695	0.473239		Telogaster:Hayes	-0.274401	0.228728	-1.19968	0.238322
							Length	0.17894	0.0902713	1.98225	0.0590137		Telogaster:Waihola	-0.169526	0.33128	-0.51173	0.612054
							Sex - Male	0.978747	0.914885	1.0698	0.295349		Stegodexamene:Hayes	-0.104537	0.175554	-0.595471	0.55536
													Stegodexamene:Waihola	0.0676531	0.218157	0.310112	0.758315
													Length:Hayes	0.0836262	0.100277	0.833952	0.409964
													Length:Waihola	0.0838125	0.452333	0.185289	0.854072
Exploration
	Intercept	2.22321	0.322821	6.88682	< 0.001*		Intercept	2.23389	0.31028	7.1996	< 0.001*		Intercept	1.53589	0.301145	5.10017	< 0.001*
	Tylodelphys	0.0174173	0.00817792	2.1298	0.042*		Tylodelphys	-0.00103345	0.0126351	-0.0817918	0.935491		Waihola	-0.666242	1.35068	-0.493263	0.624908
	Sex - Male	-0.827014	0.425037	-1.94575	0.0617861		Apatemon	0.00396627	0.00174691	2.27046	0.032*		Apatemon:Hayes	0.00346138	0.00141592	2.44462	0.020*
							Telogaster	0.0970901	0.0844203	1.15008	0.261442		Apatemon:Waihola	0.00698805	0.0104317	0.669888	0.507325
							Stegodexamene	-0.0535656	0.0648156	-0.826431	0.4167		Telogaster:Hayes	0.0985268	0.0819229	1.20268	0.237174
							Length	-0.0119809	0.0404586	-0.296127	0.76968		Telogaster:Waihola	-0.0667949	0.118654	-0.562941	0.577064
							Sex - Male	-0.845402	0.410041	-2.06175	0.050*		Stegodexamene:Hayes	-0.0592106	0.0628777	-0.941679	0.352811
													Stegodexamene:Waihola	0.047069	0.0781367	0.602393	0.550796
													Length:Hayes	-0.00769409	0.0359159	-0.214225	0.831615
													Length:Waihola	-0.0158249	0.162011	-0.0976781	0.922745
Activity
	Intercept	2.1365	0.315142	6.77948	< 0.001*		Intercept	2.13266	0.293056	7.27731	< 0.001*		Intercept	1.56559	0.324717	4.82139	< 0.001*
	Tylodelphys	0.0219397	0.00798339	2.74816	0.010*		Tylodelphys	0.00583146	0.0119337	0.488655	0.629521		Waihola	-0.931873	1.45641	-0.639843	0.526441
	Sex - Male	-0.551137	0.414926	-1.32828	0.194812		Apatemon	0.0032964	0.00164994	1.99789	0.0571824		Apatemon:Hayes	0.00346542	0.00152675	2.2698	0.029*
							Telogaster	0.161463	0.0797341	2.02502	0.054127		Apatemon:Waihola	0.00455776	0.0112482	0.405199	0.687797
							Stegodexamene	-0.0800228	0.0612176	-1.30719	0.203536		Telogaster:Hayes	0.163784	0.0883355	1.85411	0.0721655
							Length	-0.0167602	0.0382127	-0.438603	0.664872		Telogaster:Waihola	-0.0757112	0.127941	-0.591765	0.557811
							Sex - Male	-0.544524	0.38728	-1.40602	0.172533		Stegodexamene:Hayes	-0.0831441	0.0677994	-1.22632	0.228264
													Stegodexamene:Waihola	0.0821375	0.0842529	0.974891	0.336304
													Length:Hayes	-0.0058289	0.0387273	-0.150512	0.881225
													Length:Waihola	-0.0392089	0.174692	-0.224445	0.823716
Aggression
	Intercept	0.304863	0.19073	1.5984	0.121178		Intercept	0.322244	0.189076	1.70431	0.101237		Intercept	0.405316	0.168064	2.41168	0.021*
	Tylodelphys	0.000383884	0.00483168	0.0794513	0.937239		Tylodelphys	0.00761451	0.00769946	0.988967	0.332546		Waihola	0.0250748	0.753792	0.0332649	0.973652
	Sex - Male	-0.116091	0.25112	-0.462292	0.647444		Apatemon	-0.000232505	0.00106452	-0.218414	0.828953		Apatemon:Hayes	0.000273085	0.0007902	0.345589	0.73172
							Telogaster	0.0832178	0.0514434	1.61766	0.118806		Apatemon:Waihola	0.00170695	0.00582172	0.293204	0.771098
							Stegodexamene	0.000273958	0.0394968	0.0069362	0.994523		Telogaster:Hayes	0.0851398	0.0457197	1.86221	0.0709855
							Length	-0.0466573	0.0246543	-1.89246	0.070553		Telogaster:Waihola	-0.00210922	0.0662184	-0.0318525	0.974771
							Sex - Male	-0.146026	0.249868	-0.584412	0.564397		Stegodexamene:Hayes	-8.37951e-05	0.0350909	-0.00238794	0.998108
													Stegodexamene:Waihola	0.0311189	0.0436067	0.713627	0.48019
													Length:Hayes	-0.036117	0.020044	-1.80189	0.0801825
													Length:Waihola	0.0362455	0.0904154	0.400877	0.690947
